# Supplementary material for: Effects of Photo and Genotype-Based Misidentification Error on Estimates of Survival, Detection and State Transition using Multistate Survival Models
Source: PubMed Central journal article supplement (PMC4709094; doi:10.1371/journal.pone.0145640), 2016-01-11
Supplement: pone.0145640.s004.pdf [file pone.0145640.s004.pdf]

#R code for simulating multistage capture histories, applying a misidentification  
#error and then fitting a multistage model with RMark.

```
n.occasions <- 3
  n.states <- 3
  n.obs <- 3
  marked <- matrix(NA, ncol = n.states, nrow = n.occasions)
  marked[,1] <- rep(n.releases, n.occasions)
  marked[,2] <- rep(n.releases, n.occasions)
  marked[,3] <- rep(0, n.occasions)

# Define matrices with survival, transition and recapture probabilities
# These are 4-dimensional matrices, with
# Dimension 1: state of departure
# Dimension 2: state of arrival
# Dimension 3: individual
# Dimension 4: time

# 1. State process matrix
totrel <- sum(marked)*(n.occasions-1)
PSI.STATE <- array(NA, dim=c(n.states, n.states, totrel, n.occasions-1))
for (i in 1:totrel){
  for (t in 1:(n.occasions-1)){
    PSI.STATE[, , i, t] <- matrix(c(
      phiA*(1-psiAB), phiA*psiAB, 1-phiA,
      phiB*psiBA, phiB*(1-psiBA), 1-phiB,
      0, 0, 1 ), nrow = n.states, byrow = TRUE)
  } #t
} #i

# 2.Observation process matrix
PSI.OBS <- array(NA, dim=c(n.states, n.obs, totrel, n.occasions-1))
for (i in 1:totrel){
  for (t in 1:(n.occasions-1)){
    PSI.OBS[, , i, t] <- matrix(c(
      pA, 0, 1-pA,
      0, pB, 1-pB,
      0, 0, 1 ), nrow = n.states, byrow = TRUE)
  } #t
} #i

# Define function to simulate multistate capture-recapture data
simul.ms <- function(PSI.STATE, PSI.OBS, marked, unobservable = NA){
  # Unobservable: number of state that is unobservable
  n.occasions <- dim(PSI.STATE)[4] + 1
  CH <- CH.TRUE <- matrix(NA, ncol = n.occasions, nrow = sum(marked))
  # Define a vector with the occasion of marking
  mark.occ <- matrix(0, ncol = dim(PSI.STATE)[1], nrow = sum(marked))
  g <- colSums(marked)
  for (s in 1:dim(PSI.STATE)[1]){
    if (g[s]==0) next # To avoid error message if nothing to replace
    mark.occ[(cumsum(g[1:s])-g[s]+1)[s]:cumsum(g[1:s])[s],s] <-
      rep(1:n.occasions, marked[1:n.occasions,s])
  }
}
```

```

} #s
for (i in 1:sum(marked)){
  for (s in 1:dim(PSI.STATE)[1]){
    if (mark.occ[i,s]==0) next
    first <- mark.occ[i,s]
    CH[i,first] <- s
    CH.TRUE[i,first] <- s
  } #s
  for (t in (first+1):n.occasions){
    # Multinomial trials for state transitions
    if (first==n.occasions) next
    state <- which(rmultinom(1, 1, PSI.STATE[CH.TRUE[i,t-1],,i,t-1])==1)
    CH.TRUE[i,t] <- state
    # Multinomial trials for observation process
    event <- which(rmultinom(1, 1, PSI.OBS[CH.TRUE[i,t],,i,t-1])==1)
    CH[i,t] <- event
  } #t
} #i
# Replace the NA and the highest state number (dead) in the file by 0
CH[is.na(CH)] <- 0
CH[CH==dim(PSI.STATE)[1]] <- 0
CH[CH==unobservable] <- 0
id <- numeric(0)
for (i in 1:dim(CH)[1]){
  z <- min(which(CH[i,]!=0))
  ifelse(z==dim(CH)[2], id <- c(id,i), id <- c(id))
}
return(list(CH=CH[-id,], CH.TRUE=CH.TRUE[-id,]))
# CH: capture histories to be used
# CH.TRUE: capture histories with perfect observation
}

# Execute function
sim <- simul.ms(PSI.STATE, PSI.OBS, marked)
CH <- sim$CH

# Compute vector with occasion of first capture
get.first <- function(x) min(which(x!=0))
f <- apply(CH, 1, get.first)

# Recode CH matrix: note, a 0 is not allowed in WinBUGS!
# 1 = seen alive in A, 2 = seen alive in B, 3 = not seen
# Recoded CH
#rCH[rCH==0] <- 3
CH<-as.data.frame(CH)
CH$ch <- paste(CH[,1],CH[,2],CH[,3], sep = "")
ch<- CH[,4]
ch<-as.data.frame(ch)
ch[] <- lapply(ch, as.character)

# Recode CH matrix: note, a 0 is not allowed in WinBUGS!
# 1 = seen alive in A, 2 = seen alive in B, 3 = not seen
# Recoded CH
#rCH[rCH==0] <- 3

```

```

# Subset rows with >1 capture
CH <- as.data.frame(CH)
CH$V1S <- ifelse(CH$V1>=1,1,0)
CH$V2S <- ifelse(CH$V2>=1,1,0)
CH$V3S <- ifelse(CH$V3>=1,1,0)
CH$SUM <- CH$V1S + CH$V2S + CH$V3S

#Split CH into multi captures and single captures
CHsubmulti <- filter(CH, SUM>1)
CHsubmulti <- CHsubmulti[ , -c(4,5,6,7,8)]
CHsubmulti$ID<-seq.int(nrow(CHsubmulti))

CHsubsingle <- filter(CH, SUM==1)
CHsubsingle <- CHsubsingle[ , -c(4,5,6,7,8)]

#Remove Row ID
CHsubmulti$ID <- NULL

####Approach fragmenting a percentage of captures#####
# Turn dataframe into a matrix for ease
CH_matrix <- as.matrix(CHsubmulti, rownames.force=TRUE)

# Which elements are non-zero
nonzeros <- which(CH_matrix > 0)

# What class are these events
events <- CH_matrix[nonzeros]

# Generate a vector of the same length that randomly changes some of them (say,
5%)
# into a non-event
error <- sample(0:1, size = length(nonzeros), replace=TRUE, prob = c(perror, (1-
pererror)))

# Multiply the error indicator with the event type to change them, then reassign
# them into a new capture history matrix
new_events <- events * error

ghosts <- CH_matrix
ghosts[nonzeros] <- new_events

# Identify which rows have changed by calculating difference matrix
# This shows where changes were made and the class of the original event
diff <- CH_matrix - ghosts

# Finalize the ghost history

# Pull out the single changes and change row names to avoid confusion
single_change <- which(apply(diff > 0, 1, sum) == 1)
diff_single <- diff[single_change, , drop = FALSE]
if(nrow(diff_single) > 0)
  rownames(diff_single) <- paste0("ghost", 1:nrow(diff_single))

# Add single changes to the modified original

```

```

ghosts <- rbind(ghosts, diff_single)

# Did any capture histories experience multiple changes? Usually a few...
#event_changes <- arrange(data.frame(CH = rownames(CH_matrix),
#n_changes = apply(diff > 0, 1, sum)), -n_changes)
#head(event_changes, 10)

# Identify these rows
(multiple_changes <- which(apply(diff > 0, 1, sum) > 1))

if(length(multiple_changes) > 0) {

  # Compare original to modified
  # Basically making sure I didn't screw up; looks good
  (CH_matrix[multiple_changes, ,drop=FALSE])
  (ghosts[multiple_changes, , drop=FALSE])

  # What about the capture histories with multiple event changes...
  # Here they are
  (mult_changes <- diff[multiple_changes, , drop=FALSE])

  # Find out how many ghost records we'll need for each record (usually 2, but 3
is not out of the question)
  (mults_to_add <- apply(mult_changes > 0, 1, sum))

  # Without spending a lot more time thinking about this, I'm going to loop
through these records
  # and make the necessary number of ghost histories
  # There's probably a faster way

  # Duplicate each row the correct number of times
  (diff_multiple <- mult_changes[rep(rownames(mult_changes), mults_to_add), ])

  for (CH in rownames(mult_changes)) {

    # Which records in diff_multiple are we dealing with?
    which_rows <- which(rownames(diff_multiple) == CH)

    for (row in which_rows) {
      index <- which(which_rows == row)
      elems_to_change <- which(mult_changes[CH, ] > 0)

      # Modify the record
      tmp <- mult_changes[CH, ]
      multiplier <- rep(0, length(tmp))
      multiplier[elems_to_change[index]] <- 1
      diff_multiple[row, ] <- tmp * multiplier

    }

  }

  # Change rownames (beginning where we left off) to avoid confusion

```

```

    rownames(diff_multiple) <- paste0("ghost", seq(nrow(diff_single) + 1, by = 1,
length.out = nrow(diff_multiple)))

    # Add to the ghost history record
    ghosts <- rbind(ghosts, diff_multiple)

}

# You can change it back to a data frame if you want
ghosts <- data.frame(ghosts)

ghosts$ID <- NULL

# Recombine dataframes.
rCH <- rbind(CHsubsingl, ghosts) # combine the real observations with the
fragments

# Drop empty rows
sv <- apply(rCH, 1, sum) == 0 # if any input rows have only one obsersevation
the corresponding ghost row will be empty
rCH <- rCH[!sv, ]

#Reformat for RMark
rCH$ch <- paste(rCH[,1],rCH[,2],rCH[,3], sep = "")
rCH2<- rCH[,4]
rCH2<-as.data.frame(rCH2)
rCH2$ch <- rCH2$rCH2
rCH2$rCH2 <- NULL
str(rCH2)
rCH2[] <- lapply(rCH2, as.character)

#Fit MS Model in RMark
run.mstrata=function()
{
  #
  # Process data
  #
  mstrata.processed=process.data(rCH2,model="Multistrata")
  #
  # Create default design data
  #
  mstrata.ddl=make.design.data(mstrata.processed)
  #
  # Define range of models for S; note that the betas will differ from the
output
  # in MARK for the ~stratum = S(s) because the design matrix is defined using
  # treatment contrasts for factors so the intercept is stratum A and the other
  # two estimates represent the amount that survival for B abd C differ from A.
  # You can use force the approach used in MARK with the formula ~-1+stratum
which
  # creates 3 separate Betas - one for A,B and C.

```

```

#
S.stratum=list(formula=~stratum)
#
# Define range of models for p
#
p.stratum=list(formula=~stratum)
#
# Define range of models for Psi; what is denoted as s for Psi
# in the Mark example for Psi is accomplished by -1+stratum:tostratum which
# nests tostratum within stratum. Likewise, to get s*t as noted in MARK you
# want ~-1+stratum:tostratum:time with time nested in tostratum nested in
# stratum.
#
Psi.s=list(formula=~-1+stratum:tostratum)
#
# Create model list and run assortment of models
#
model.list=create.model.list("Multistrata")
#
# Add on specific models that are paired with fixed p's to remove confounding
#
#
# Run the list of models
#

mstrata.results=mark.wrapper(model.list,data=mstrata.processed,ddl=mstrata.ddl,thread
s=2)
#
# Return model table and list of models
#
return(mstrata.results)
}
mstrata.results=run.mstrata()
#summary results for list of models run
mstrata.results
#model average estimates of real parameters
model.average(mstrata.results)
top = mstrata.results$S.stratum.p.stratum.Psi.s
summary(top, showall = FALSE)
head(top$results$real)
estimates <- top$results$real$estimate[c(1,2,3,4,5,8)]

```
